# Supplementary material
Source: PubMed Central journal article supplement (PMC3027055)
Supplement: nucl0106_0513SD1.pdf [file nucl0106_0513SD1.pdf]

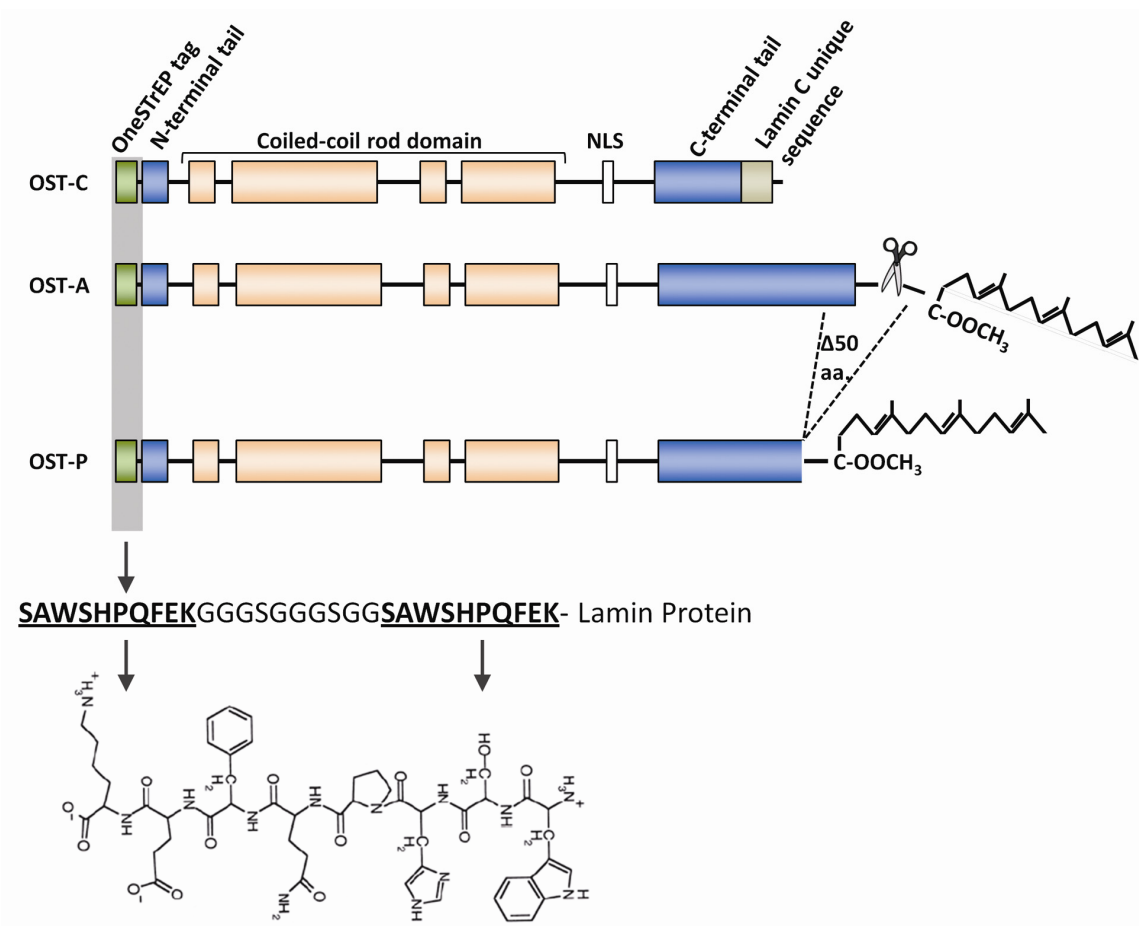

**Figure S1. Schematic overview of OneSTrEP-tagged lamin constructs.** Lamin A, C and progerin were tagged at their N-terminus by a OneSTrEP-tag, consisting of two Strep-tag II epitopes (underlined), which interact with high affinity to Streptactin matrix, separated by a serine and alanine linker region. The chemical structure of a Strep-tag II epitope is further depicted. Mature OneSTrEP-tagged lamin A (OST-A) is released after farnesylation of the C-terminal Caax-motif, cleavage of the -aax amino acids and subsequent carboxymethylation of the C-terminus, followed by an upstream cleavage by Zmpste24 in mice cells (indicated by scissor; Face-1 for human cell lines). Due to a loss of 50 amino acids (indicated as  $\Delta 50$  aa.), including the Zmpste24 restriction site, OneSTrEP-tagged progerin (OST-P) is only processed by farnesylation of the C-terminal Caax-motif, subsequent cleavage of the -aax amino acids and carboxymethylation of the C-terminus, and cannot be further cleaved by Zmpste24. OneSTrEP-tagged lamin C (OST-C), contains a Lamin C-specific terminus, as well as the A-type lamins common coiled-coil rod domain and nuclear localization signal (NLS).

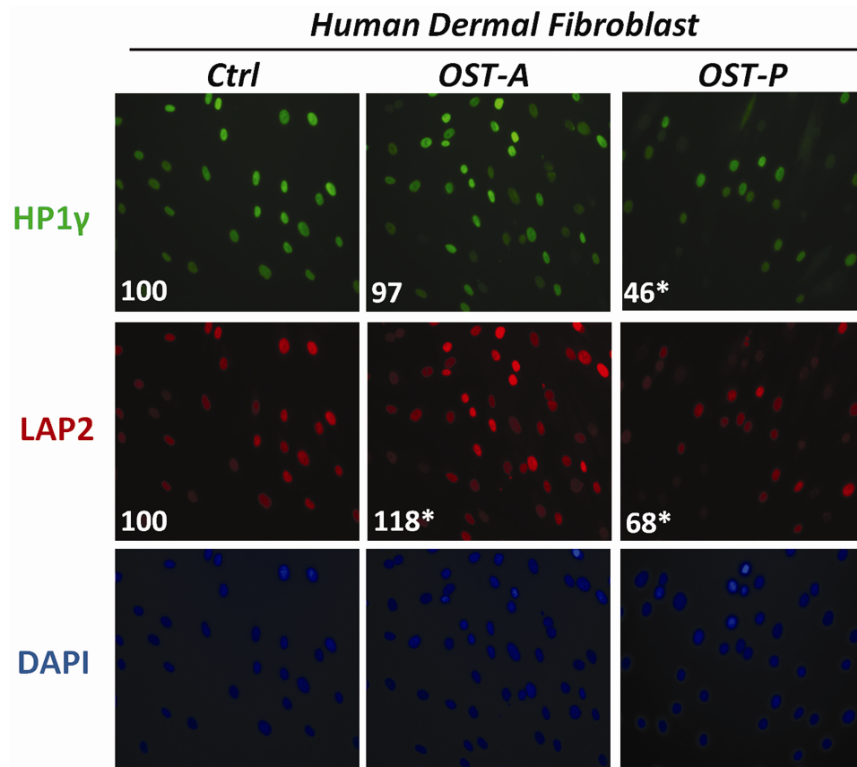

**Figure S2. Progerin dependent loss of HP1 $\gamma$  and LAP2 protein.** Fluorescent detection of HP1 $\gamma$ , LAP2 and DNA (DAPI) in human dermal fibroblasts (HDF) expressing an empty vector, OST-A or OST-P at endogenous lamin A levels. The nuclear intensity of total LAP2 (all isoforms included) and HP1 $\gamma$  was determined as described in the Material and Methods, and average expression values are depicted in numbers. Distribution curves were tested to be different or comparable using a Kolmogorov-Smirnov statistical test. An asterisk indicates a significant ( $p < 0.01$ ) difference between HDFs expressing OST-A or OST-P in comparison to empty vector (Ctrl) infected HDFs. The following antibodies were used:  $\alpha$ -HP1 $\gamma$ , mab3450, Chemicon, Temecula, USA ;  $\alpha$ -LAP2, kind gift from K. Wilson, raised against residues 1-187 of human LAP2, and suitable for detection of all LAP2 isoforms).

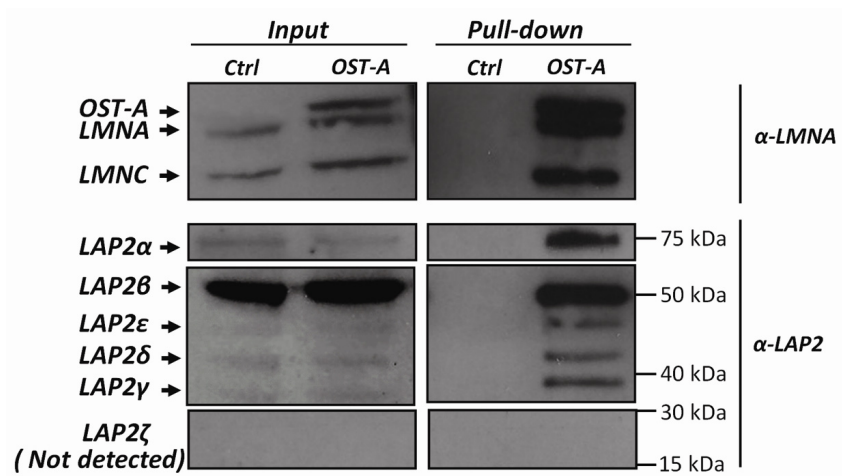

**Figure S3. Interactions between Lamin A and LAP2 isoforms.** Western blot of a OneSTrEP pull-down performed on U2OS cells infected with OST-A and control virus. Input and pull-down fractions were immunoblotted with  $\alpha$ -LaminA/C (Sc6215, Goat, Santa Cruz; detects endogenous Lamin A and C as well as OST-A) and  $\alpha$ -LAP2 (Y-20, Sc19783, Goat, Santa Cruz; suitable for LAP2 $\alpha$ , $\beta$ , $\gamma$ , $\delta$ , $\epsilon$  and  $\zeta$  detection). With the exception of LAP2 $\zeta$ , which could not be detected, all other isoforms were immunoblotted at their respective molecular weights.

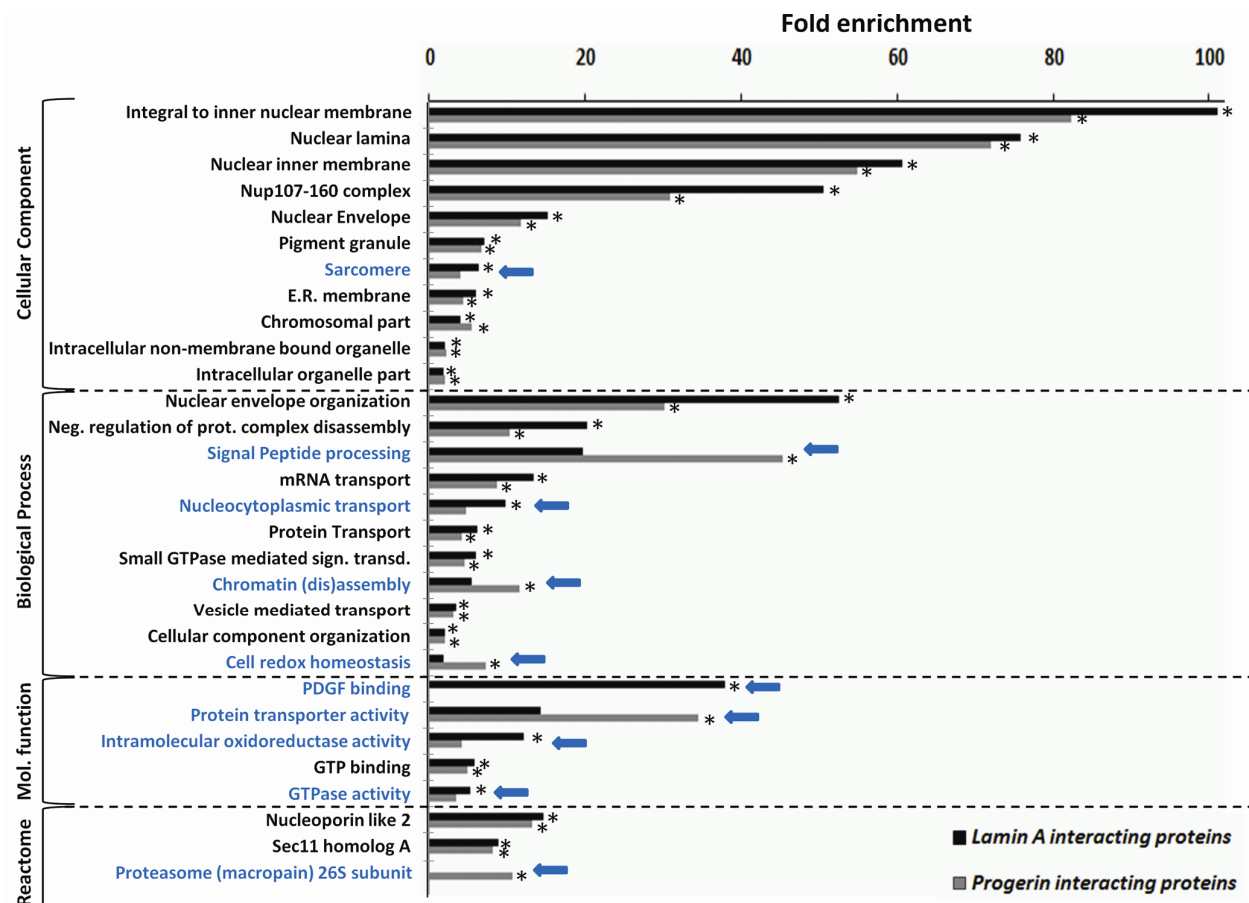

**Figure S4. GO analysis of lamin A and progerin interacting proteins identified in MEFs.**

Identified lamin A and progerin interacting proteins were analyzed separately for the GO categories “cellular components” (CC), “biological process” (BP), “molecular function” (MF), as well as the reactome (R) database. Significant categories were determined by standard statistical algorithms incorporated into the DAVID database (see Material & Methods) and are indicated by asterisks ( $p < 1 \times 10^{-3}$ ; random proteins used as background). Categories enriched for by either OST-A or OST-P are indicated by arrows.

**Table S1. Mass spectrometry data for identified lamin A interacting proteins in NkITAg cells.**

Mascot scores for identified lamin A interacting proteins in NkITAg cells are listed. Furthermore it is indicated whether identified lamin A interactors were identified in two previous NE proteome studies (see grey shaded column) which had identified proteins in an INM/lumen/ONM<sup>6</sup> fraction or an INM/lamina/nucleoplasmic fraction<sup>10</sup>. Hashes indicate proteins GO-annotated as 'Extracellular region'.

| GI code   | Entrez M.M. | Name             | NkITAg Ctrl | NkITAg OST-A | NkITAg OST-A | Previously identified in NE? |
|-----------|-------------|------------------|-------------|--------------|--------------|------------------------------|
| 74219697  | 16905       | Lmna             | 75          | 3534         | 3230         | Yes <sup>6,10</sup>          |
| 52869     | 16906       | Lmnb1            |             | 2272         | 2122         | Yes <sup>6,10</sup>          |
| 27503473  | 16907       | Lmnb2            |             | 1230         | 1296         | Yes <sup>6,10</sup>          |
| 74202572  | 21917       | LAP2β            |             | 1154         | 1152         | Yes <sup>6,10</sup>          |
| 9845253   | 56258       | Hnrph2           |             | 379          | 370          | Yes <sup>10</sup>            |
| 9790069   | 53817       | Bat1a            |             | 350          |              | Yes <sup>10</sup>            |
| 28192672  | 98386       | Lbr              |             | 342          | 378          | Yes <sup>6,10</sup>          |
| 103484305 | 208263      | Tor1aip1         |             | 327          | 118          | Yes <sup>10</sup>            |
| 114612484 | 628648      | HP1g             |             | 302          | 185          | Yes <sup>10</sup>            |
| 50953786  | 223697      | Unc84b/SUN2      |             | 302          | 166          | Yes <sup>10</sup>            |
| 12852531  | 77053       | Unc84a/SUN1      |             | 241          | 104          | Yes <sup>6,10</sup>          |
| 20379977  | 232989      | Hnrpul1          | 63          | 234          |              | Yes <sup>10</sup>            |
| 74180977  | 17886       | Myh9             |             | 220          | 39           | Yes <sup>6,10</sup>          |
| 3065929   | 22628       | Ywhag            |             | 198          | 204          | Yes <sup>10</sup>            |
| 12832758  | 100046125   | RAB5A            |             | 179          |              | Yes <sup>10</sup>            |
| 6679641   | 13726       | Emd              |             | 174          | 211          | Yes <sup>6,10</sup>          |
| 554262    | 26900       | Ddx3y            |             | 172          | 119          | Yes <sup>10</sup>            |
| 21704124  | 433739      | RBM10            |             | 168          |              | Yes <sup>10</sup>            |
| 7106546   | 383901      | Mme1             |             | 163          |              | Yes <sup>10</sup>            |
| 1389682   | 16480       | Jup <sup>#</sup> |             | 147          |              | Yes <sup>10</sup>            |
| 77812697  | 22138       | Ttn              |             | 136          |              | Yes <sup>10</sup>            |
| 6919955   | 24010       | Ik               |             | 136          | 68           | Yes <sup>10</sup>            |
| 4507785   | 100043681   | UBC9             |             | 132          |              | Yes <sup>10</sup>            |
| 21312784  | 100047806   | PPIL1            | 32          | 127          |              | Yes <sup>10</sup>            |
| 267150    | 21973       | Top2a            |             | 123          |              | Yes <sup>10</sup>            |
| 10946940  | 59021       | Rab2             |             | 117          | 172          | Yes <sup>10</sup>            |
| 6755863   | 22027       | Hsp90b1          |             | 113          |              | Yes <sup>10</sup>            |
| 145864461 | 380664      | Lemd3            |             | 113          | 89           | Yes <sup>6,10</sup>          |
| 26325884  | 624311      | IPO2             |             | 111          |              | Yes <sup>10</sup>            |
| 145699091 | 319565      | Syne2            |             | 95           | 106          | Yes <sup>10</sup>            |
| 148670589 | 19345       | Rab5c            |             |              | 313          | Yes <sup>10</sup>            |
| 4501887   | 667260      | actG             |             | 677          |              | No                           |
| 34147513  | 19349       | Rab7             | 93          | 387          | 297          | No                           |
| 13430890  | 50709       | Hist1h1e         |             | 244          | 226          | No                           |
| 5902786   | 100045085   | ANX3             |             | 242          | 81           | No                           |
| 9055370   | 54709       | Eif3i            |             | 232          | 44           | No                           |
| 109735018 | 239673      | 4732456N10Rik    |             | 226          |              | No                           |
| 7710086   | 19325       | Rab10            |             | 220          | 219          | No                           |
| 51092301  | 406223      | EG406223         |             | 196          |              | No                           |
| 12857003  | 66978       | Luc7l            |             | 192          |              | No                           |
| 6671694   | 12419       | Cbx5             | 47          | 179          | 129          | No                           |
| 12229677  | 11867       | Arpc1b           |             | 178          |              | No                           |
| 30424655  | 270192      | Rab6b            |             | 178          |              | No                           |
| 21703344  | 20224       | Sar1a            |             | 172          | 179          | No                           |
| 109081395 | 22003       | Tpm1             |             | 162          |              | No                           |
| 9790159   | 56305       | Pitpnb           |             | 158          |              | No                           |
| 1621617   | 21849       | Trim28           | 75          | 153          | 298          | No                           |
| 12845035  | 675981      | eif2a            |             | 148          |              | No                           |
| 6755448   | 20333       | Sec22b           |             | 143          | 62           | No                           |
| 12836024  | 66870       | Serbp1           |             | 129          |              | No                           |
| 4063383   | 20901       | Strap            | 33          | 118          |              | No                           |
| 45544618  | 66902       | Mtap             |             | 117          |              | No                           |
| 27369836  | 217980      | Larp5            |             | 115          |              | No                           |
| 21312564  | 218501      | cnn3             |             | 106          |              | No                           |
| 149272300 | 100039086   | Gm15032          |             | 105          |              | No                           |
| 6755204   | 19173       | Psmb5            |             | 105          | 101          | No                           |
| 21595163  | 234407      | Glt25d1          |             | 104          |              | No                           |
| 12846304  | 13885       | Esd              |             | 104          |              | No                           |
| 198637    | 14375       | Ku70             | 33          | 100          |              | No                           |
| 124486993 | 433923      | EG433923         |             |              | 131          | No                           |

**Table S2. GO analysis for identified lamin A (NkITag) and preferential lamin A/progerin (MEF) interactors.** Identified lamin A interacting proteins in NkITag cells and preferential lamin A/progerin interactors in MEFs, were analyzed separately for the GO categories “cellular components” (GO-CC), “biological process” (GO-BP), “molecular function” (GO-MF), as well as the Reactome (R) database. Categories are listed, together with the amount of proteins represented in the category compared to the total amount of annotated proteins. Enrichment factors are determined in comparison to random protein sets as well as NE proteins<sup>6,10</sup>, and p-values are indicated ( $p < 1 \times 10^{-3}$  indicated in bold) based on statistical algorithms incorporated into the DAVID database.<sup>22,23-71</sup>

| Protein Set | Database | Database Category                | Protein in category/<br>Total annotated Proteins | Enrichment Factor vs. Random Protein Background | P-Value        | Enrichment Factor vs. NE Protein Background | P-value        |
|-------------|----------|----------------------------------|--------------------------------------------------|-------------------------------------------------|----------------|---------------------------------------------|----------------|
| NKLTAG      | GO-CC    | GO:0005635~nuclear envelope      | 12 52                                            | 21.5                                            | <b>5.0E-12</b> | 6.3                                         | <b>1.0E-07</b> |
| NKLTAG      | GO-CC    | GO:0048770~pigment granule       | 6 52                                             | 19.3                                            | <b>1.3E-05</b> | 6.2                                         | 2.2E-02        |
| NKLTAG      | GO-CC    | GO:0015629~actin cytoskeleton    | 6 52                                             | 8.0                                             | <b>8.1E-04</b> | 2.8                                         | 2.8E-01        |
| NKLTAG      | GO-CC    | GO:0005694~chromosome            | 6 52                                             | 4.3                                             | <b>9.7E-03</b> | 2.0                                         | 2.3E-01        |
| NKLTAG      | GO-BP    | GO:0006998~nuclear envelope      | 3 39                                             | 121.5                                           | <b>2.5E-04</b> | 27.5                                        | <b>2.1E-04</b> |
| NKLTAG      | GO-BP    | GO:0031032~actomyosin structure  | 3 39                                             | 43.8                                            | <b>2.0E-03</b> | 4.8                                         | 1.0E+00        |
| NKLTAG      | GO-BP    | GO:0006333~chromatin assembly or | 3 39                                             | 10.0                                            | <b>9.9E-03</b> | 1.2                                         | 1.0E+00        |
| NKLTAG      | GO-BP    | GO:0015031~protein transport     | 11 39                                            | 6.2                                             | <b>5.6E-06</b> | 2.8                                         | 4.5E-02        |
| NKLTAG      | GO-MF    | GO:0000166~nucleotide binding    | 18 53                                            | 2.4                                             | <b>5.5E-04</b> | 1.5                                         | 1.2E-01        |
|             |          |                                  |                                                  |                                                 |                |                                             |                |
| MEF diff    | GO-CC    | GO:0005635~nuclear envelope      | 4 30                                             | 12.4                                            | <b>3.6E-03</b> |                                             |                |
| MEF diff    | GO-BP    | GO:0034660~ncRNA metabolic       | 4 29                                             | 9.7                                             | <b>7.1E-03</b> |                                             |                |
| MEF diff    | GO-BP    | GO:0015031~protein transport     | 7 29                                             | 5.3                                             | <b>1.4E-03</b> |                                             |                |
| MEF diff    | GO-BP    | GO:0016070~RNA metabolic process | 6 29                                             | 4.4                                             | <b>8.7E-03</b> |                                             |                |
| MEF diff    | GO-MF    | GO:0003924~GTPase activity       | 4 29                                             | 16.6                                            | <b>1.6E-03</b> |                                             |                |
| MEF diff    | Reactome | 823753:RAN binding protein 2     | 4 12                                             | 8.8                                             | <b>6.9E-03</b> |                                             |                |
|             |          |                                  |                                                  |                                                 |                |                                             |                |



**Table S3. GO analysis for identified lamin A and progerin interacting proteins in MEFs.**

Identified lamin A and progerin interacting proteins in MEFs, as well as previously identified NE proteins were analyzed separately for the GO categories “cellular components” (GO-CC), “biological process” (GO-BP), “molecular function” (GO-MF), as well as the reactome (R) database.<sup>22</sup> Categories are listed together with the amount of proteins represented in the category versus to the total amount of annotated proteins, the enrichment factor compared to random protein sets and significance level. Significance p-values ( $p < 1 \times 10^{-3}$ ; statistic testing includes kappa statistic measurement and is further described elsewhere) are indicated in bold; non-significant values are underlined or blank in case no proteins was found within the respective GO-term.

| Database | Database Category                             | MEF OST-A interacting proteins                    |                       |                | MEF OST-P interacting proteins                    |                       |                | Previously identified NE proteins                 |                       |                |
|----------|-----------------------------------------------|---------------------------------------------------|-----------------------|----------------|---------------------------------------------------|-----------------------|----------------|---------------------------------------------------|-----------------------|----------------|
|          |                                               | Proteins in category/<br>Total annotated Proteins | Enrichment Factor vs. | P-Value        | Proteins in category/<br>Total annotated Proteins | Enrichment Factor vs. | P-Value        | Proteins in category/<br>Total annotated Proteins | Enrichment Factor vs. | P-Value        |
| GO-CC    | GO:0005639~integral to nuclear inner membrane | 3 141                                             | 101.                  | <b>2.9E-04</b> | 3 170                                             | 82.4                  | <b>4.3E-04</b> | 3 959                                             | 14.9                  | 1.3E-02        |
| GO-CC    | GO:0005652~nuclear lamina                     | 6 141                                             | 75.8                  | <b>4.7E-09</b> | 7 170                                             | 72.1                  | <b>7.8E-11</b> | 6 959                                             | 11.1                  | <b>6.4E-05</b> |
| GO-CC    | GO:0005637~nuclear inner membrane             | 9 141                                             | 60.6                  | <b>4.3E-13</b> | 10 170                                            | 54.9                  | <b>2.1E-14</b> | 9 959                                             | 8.9                   | <b>1.7E-06</b> |
| GO-CC    | GO:0031080~Nup107-160 complex                 | 4 141                                             | 50.5                  | <b>5.0E-05</b> | 3 170                                             | 30.9                  | <b>3.9E-03</b> | 7 959                                             | 13.0                  | <b>2.3E-06</b> |
| GO-CC    | GO:0005635~nuclear envelope                   | 23 141                                            | 15.2                  | <b>8.5E-20</b> | 22 170                                            | 11.8                  | <b>1.3E-16</b> | 63 959                                            | 6.1                   | <b>3.8E-33</b> |
| GO-CC    | GO:0048770~pigment granule                    | 6 141                                             | 7.1                   | <b>1.5E-03</b> | 7 170                                             | 6.8                   | <b>5.6E-04</b> | 18 959                                            | 3.1                   | <b>4.2E-05</b> |
| GO-CC    | GO:0030017~sarcomere                          | 5 141                                             | 6.3                   | <b>7.9E-03</b> | 4 170                                             | 4.1                   | 7.2E-02        | 16 959                                            | 3.0                   | <b>2.5E-04</b> |
| GO-CC    | GO:0005789~endoplasmic reticulum membrane     | 9 141                                             | 6.0                   | <b>1.3E-04</b> | 8 170                                             | 4.3                   | <b>2.5E-03</b> | 18 959                                            | 1.8                   | 2.7E-02        |
| GO-CC    | GO:0044427~chromosomal part                   | 13 141                                            | 4.1                   | <b>7.0E-05</b> | 21 170                                            | 5.4                   | <b>1.6E-09</b> | 58 959                                            | 2.7                   | <b>7.0E-12</b> |
| GO-CC    | GO:0043232~intracellular non-membrane-        | 40 141                                            | 2.1                   | <b>5.0E-06</b> | 53 170                                            | 2.3                   | <b>7.2E-09</b> | 279 959                                           | 2.2                   | <b>1.3E-39</b> |
| GO-CC    | GO:0044446~intracellular organelle part       | 60 141                                            | 1.9                   | <b>1.3E-07</b> | 78 170                                            | 2.0                   | <b>5.4E-11</b> | 495 959                                           | 2.3                   | <b>1.4E-93</b> |
| GO-BP    | GO:0006998~nuclear envelope organization      | 4 120                                             | 52.7                  | <b>4.6E-05</b> | 3 157                                             | 30.2                  | <b>4.1E-03</b> | 6 876                                             | 10.8                  | <b>8.9E-05</b> |
| GO-BP    | GO:0043242~negative regulation of protein     | 6 120                                             | 20.3                  | <b>1.0E-05</b> | 4 157                                             | 10.4                  | <b>6.6E-03</b> | 7 876                                             | 3.3                   | <b>9.1E-03</b> |
| GO-BP    | GO:0006465~signal peptide processing          | 1 120                                             | 19.7                  | 1.0E+00        | 3 157                                             | 45.3                  | <b>1.7E-03</b> | 3 876                                             | 8.1                   | 4.8E-02        |
| GO-BP    | GO:0051028~mRNA transport                     | 7 120                                             | 13.4                  | <b>1.3E-05</b> | 6 157                                             | 8.8                   | <b>5.8E-04</b> | 43 876                                            | 11.3                  | <b>1.5E-36</b> |
| GO-BP    | GO:0006913~nucleocytoplasmic transport        | 8 120                                             | 9.9                   | <b>1.6E-05</b> | 5 157                                             | 4.7                   | 2.1E-02        | 31 876                                            | 5.2                   | <b>4.0E-14</b> |
| GO-BP    | GO:0015031~protein transport                  | 34 120                                            | 6.2                   | <b>1.6E-17</b> | 30 157                                            | 4.2                   | <b>9.0E-11</b> | 87 876                                            | 2.2                   | <b>9.1E-12</b> |
| GO-BP    | GO:0007264~small GTPase mediated signal       | 13 120                                            | 6.0                   | <b>1.7E-06</b> | 13 157                                            | 4.6                   | <b>2.7E-05</b> | 13 876                                            | 0.8                   | 8.8E-01        |
| GO-BP    | GO:0006333~chromatin assembly or disassembly  | 5 120                                             | 5.4                   | 1.3E-02        | 14 157                                            | 11.6                  | <b>1.9E-10</b> | 27 876                                            | 4.0                   | <b>1.5E-09</b> |
| GO-BP    | GO:0016192~vesicle-mediated transport         | 14 120                                            | 3.6                   | <b>1.4E-04</b> | 16 157                                            | 3.1                   | <b>1.9E-04</b> | 31 876                                            | 1.1                   | 4.3E-01        |
| GO-BP    | GO:0016043~cellular component organization    | 33 120                                            | 2.1                   | <b>5.7E-05</b> | 43 157                                            | 2.1                   | <b>4.1E-06</b> | 192 876                                           | 1.6                   | <b>5.2E-13</b> |
| GO-BP    | GO:0045454~cell redox homeostasis             | 1 120                                             | 1.9                   | 1.0E+00        | 5 157                                             | 7.3                   | <b>4.7E-03</b> | 0 876                                             | 0.0                   |                |
| GO-MF    | GO:0048407~platelet-derived growth factor     | 3 135                                             | 38.0                  | <b>2.6E-03</b> | 0 167                                             | 0.0                   |                | 3 926                                             | 5.5                   | 9.8E-02        |
| GO-MF    | GO:0016864~intramolecular oxidoreductase      | 1 135                                             | 14.3                  | 1.0E+00        | 3 167                                             | 34.6                  | <b>3.1E-03</b> | 0 926                                             | 0.0                   |                |
| GO-MF    | GO:0008565~protein transporter activity       | 7 135                                             | 12.1                  | <b>2.3E-05</b> | 3 167                                             | 4.2                   | 1.6E-01        | 14 926                                            | 3.5                   | <b>1.3E-04</b> |
| GO-MF    | GO:0005525~GTP binding                        | 18 135                                            | 5.8                   | <b>1.2E-08</b> | 19 167                                            | 5.0                   | <b>5.2E-08</b> | 32 926                                            | 1.5                   | 2.3E-02        |
| GO-MF    | GO:0003924~GTPase activity                    | 6 135                                             | 5.3                   | <b>5.2E-03</b> | 5 167                                             | 3.6                   | 5.0E-02        | 22 926                                            | 2.9                   | <b>2.4E-05</b> |
| Reactome | 810245:nucleoporin like 2                     | 10 56                                             | 14.8                  | <b>7.2E-09</b> | 10 62                                             | 13.3                  | <b>1.9E-08</b> | 28 240                                            | 9.6                   | <b>2.1E-24</b> |
| Reactome | 783524:SEC11 homolog A (S. cerevisiae)        | 4 56                                              | 9.0                   | <b>8.7E-03</b> | 4 62                                              | 8.1                   | <b>9.8E-03</b> | 4 240                                             | 2.1                   | 2.9E-01        |
| REactome | 799755:proteasome (prosome, macropain) 26S    | 0 56                                              | 0.0                   |                | 10 62                                             | 10.7                  |                | 0 240                                             | 0.0                   |                |

**Table S4. Mass spectrometry data for identified lamin A and progerin interacting proteins in MEFs.** Mascot scores for identified lamin A and progerin interacting proteins in MEF+/+ and MEF-/- cell lines are listed. Interactors are categorized into interactors of lamin A, progerin or both. As many of the identified lamin A interactors were also detected at mascot scores just below inclusion criteria in progerin pull-down samples and vice versa, we used additional criteria (See material and methods) to identify preferential interactors. For selected preferential interactors it is indicated whether they were identified in two previous NE proteome studies (see grey shaded column) which had identified proteins in an INM/lumen/ONM<sup>6</sup> fraction or an INM/lamina/nucleoplasmic fraction<sup>10</sup>. Asterisk and hashes respectively indicate proteins localized to the ER lumen and extracellular regions.

| IPI code                                                                                                            | Entrez<br>M.M. | Name            | Identified as OST-A<br>Interactor? | Identified as OST-P<br>Interactor? | Preferential<br>interactor? | MEFKO Ctrl | MEFKO Ctrl | MEFKO OST-A | MEFKO OST-A | MEFKO OST-P | MEFKO OST-P | MEFWT Ctrl | MEFWT Ctrl | MEFWT OST-A | MEFWT OST-A | MEFWT OST-P | MEFWT OST-P | Previously<br>identified in NE? |
|---------------------------------------------------------------------------------------------------------------------|----------------|-----------------|------------------------------------|------------------------------------|-----------------------------|------------|------------|-------------|-------------|-------------|-------------|------------|------------|-------------|-------------|-------------|-------------|---------------------------------|
| <b>GO annotated: Nucleolar envelope, nuclear lamina, nuclear inner membrane, integral to nuclear inner membrane</b> |                |                 |                                    |                                    |                             |            |            |             |             |             |             |            |            |             |             |             |             |                                 |
| IPI00320303                                                                                                         | 234865         | Nup133          | Yes                                | No                                 | No                          |            |            | 265         |             | 107         | 52          |            |            | 119         | 39          | 87          |             | Yes <sup>10</sup>               |
| IPI00395038                                                                                                         | 103573         | Xpo1            | Yes                                | No                                 | No                          |            | 70         | 171         | 269         | 80          | 325         | 179        |            | 168         | 73          | 141         |             | Yes <sup>10</sup>               |
| IPI00331444                                                                                                         | 233726         | Ipo7            | Yes                                | No                                 | No                          |            |            | 86          | 178         | 50          | 54          |            |            |             |             |             |             | Yes <sup>10</sup>               |
| IPI00122594                                                                                                         | 226747         | Ahctf1          | Yes                                | No                                 | Yes                         |            |            | 285         |             | 64          |             |            |            | 61          | 32          | 52          |             | No                              |
| IPI00620256                                                                                                         | 16905          | Lmna            | Yes                                | Yes                                | No                          |            |            | 2825        | 2681        | 2654        | 2949        | 130        | 151        | 3970        | 3975        | 3365        | 3961        | Yes <sup>6,10</sup>             |
| IPI00230394                                                                                                         | 16906          | Lmnb1           | Yes                                | Yes                                | No                          |            |            | 2339        | 2203        | 2328        | 2407        |            |            | 1999        | 1899        | 1668        | 1764        | Yes <sup>6,10</sup>             |
| IPI00113886                                                                                                         | 16907          | Lmnb2           | Yes                                | Yes                                | No                          |            |            | 1765        | 1671        | 1652        | 1642        |            |            | 1263        | 1224        | 1152        | 1048        | Yes <sup>6,10</sup>             |
| IPI00896574                                                                                                         | 21917          | LAP2 $\alpha$   | Yes                                | Yes                                | No                          |            |            | 1090        | 1136        | 1223        | 1147        |            |            | 1449        | 1326        | 1266        | 1249        | Yes <sup>6,10</sup>             |
| IPI00828976                                                                                                         | 21917          | LAP2 $\epsilon$ | Yes                                | Yes                                | No                          |            |            | 1626        | 1556        | 1686        | 1519        |            |            | 1501        | 1535        | 1505        | 1484        | Yes <sup>6,10</sup>             |
| IPI00853982                                                                                                         | 380664         | Lemd3           | Yes                                | Yes                                | No                          |            |            | 1106        | 840         | 962         | 689         |            |            | 794         | 841         | 644         | 411         | Yes <sup>6,10</sup>             |
| IPI00263505                                                                                                         | 77053          | Unc84a/SUN1     | Yes                                | Yes                                | No                          |            |            | 1022        | 202         | 760         | 580         |            |            | 260         | 149         | 266         | 121         | Yes <sup>6,10</sup>             |
| IPI00460291                                                                                                         | 223697         | Unc84b/SUN2     | Yes                                | Yes                                | No                          |            |            | 985         | 720         | 1566        | 1280        |            |            | 1318        | 1227        | 1449        | 1126        | Yes <sup>10</sup>               |
| IPI00122215                                                                                                         | 208263         | Tor1aip1        | Yes                                | Yes                                | No                          |            | 36         | 917         | 1013        | 973         | 858         |            |            | 859         | 809         | 746         | 788         | Yes <sup>10</sup>               |
| IPI00331173                                                                                                         | 98386          | Lbr             | Yes                                | Yes                                | No                          | 260        |            | 793         | 396         | 778         | 792         |            |            | 398         | 349         | 472         | 189         | Yes <sup>6,10</sup>             |
| IPI00465876                                                                                                         | 224640         | Lemd2           | Yes                                | Yes                                | No                          |            |            | 577         | 488         | 677         | 340         |            |            | 608         | 494         | 309         | 415         | Yes <sup>10</sup>               |
| IPI00114401                                                                                                         | 13726          | Emd             | Yes                                | Yes                                | No                          |            |            | 549         | 508         | 680         | 520         |            | 39         | 659         | 644         | 679         | 681         | Yes <sup>6,10</sup>             |
| IPI00129535                                                                                                         | 59015          | Nup160          | Yes                                | Yes                                | No                          |            |            | 499         |             | 134         | 134         |            |            | 90          | 61          | 266         |             | Yes <sup>6,10</sup>             |
| IPI00453821                                                                                                         | 170762         | Nup155          | Yes                                | Yes                                | No                          |            |            | 308         | 87          | 302         | 171         |            |            | 418         | 295         | 170         | 45          | Yes <sup>6,10</sup>             |
| IPI00410800                                                                                                         | 1E+08          | LOC100039128    | Yes                                | Yes                                | No                          | 32         |            | 225         | 187         | 137         | 142         |            | 44         | 153         | 153         | 114         | 62          | Yes <sup>6,10</sup>             |
| IPI00474558                                                                                                         | 269966         | Nup98           | Yes                                | Yes                                | Yes                         |            |            | 148         | 208         |             |             |            |            | 187         | 266         | 170         | 80          | Yes <sup>6,10</sup>             |
| IPI00880644                                                                                                         | 108989         | Tpr             | Yes                                | Yes                                | Yes                         |            |            | 115         | 353         |             | 84          |            |            | 95          | 440         |             | 266         | Yes <sup>10</sup>               |
| IPI00221767                                                                                                         | 103468         | Nup107          | Yes                                | Yes                                | No                          |            |            | 94          | 63          |             |             |            |            | 304         | 201         | 100         | 149         | Yes <sup>6,10</sup>             |
| IPI00116877                                                                                                         | 212999         | Tnpo2           | Yes                                | Yes                                | No                          | 30         | 37         |             |             |             | 44          |            | 30         | 153         | 110         |             | 193         | Yes <sup>10</sup>               |
| IPI00850755                                                                                                         | 18538          | Pcna            | Yes                                | Yes                                | Yes                         |            |            | 79          | 36          | 144         | 234         |            |            |             | 108         | 51          | 150         | No                              |
| IPI00461532                                                                                                         | 445007         | Nup85           | No                                 | Yes                                | No                          |            |            | 77          | 42          |             |             |            |            | 87          |             | 109         |             | Yes <sup>6,10</sup>             |
| IPI00420243                                                                                                         | 18141          | Nup50           | No                                 | Yes                                | No                          |            |            |             |             |             |             |            |            | 84          | 87          | 123         | 93          | Yes <sup>6,10</sup>             |
| IPI00121487                                                                                                         | 106582         | Nrm             | No                                 | Yes                                | No                          |            |            | 82          |             | 161         | 91          |            |            | 42          |             |             |             | Yes <sup>6</sup>                |

| GO annotated: Nuclear pore                                        |        |              |     |     |     |     |     |      |      |      |      |     |     |      |      |      |      |                     |
|-------------------------------------------------------------------|--------|--------------|-----|-----|-----|-----|-----|------|------|------|------|-----|-----|------|------|------|------|---------------------|
| IPI00320303                                                       | 234865 | Nup133       | Yes | No  | No  |     |     | 265  |      | 107  | 52   |     |     | 119  | 39   | 87   |      | Yes <sup>10</sup>   |
| IPI00395038                                                       | 103573 | Xpo1         | Yes | No  | No  |     | 70  | 171  | 269  | 80   | 325  | 179 |     | 168  | 73   | 141  |      | Yes <sup>10</sup>   |
| IPI00331444                                                       | 233726 | Ipo7         | Yes | No  | No  |     |     | 86   | 178  | 50   | 54   |     |     |      |      |      |      | Yes <sup>10</sup>   |
| IPI00122594                                                       | 226747 | Ahctf1       | Yes | No  | Yes |     |     | 285  |      | 64   |      |     |     | 61   | 32   | 52   |      | No                  |
| IPI00129535                                                       | 59015  | Nup160       | Yes | Yes | No  |     |     | 499  |      | 134  | 134  |     |     | 90   | 61   | 266  |      | Yes <sup>6,10</sup> |
| IPI00453821                                                       | 170762 | Nup155       | Yes | Yes | No  |     |     | 308  | 87   | 302  | 171  |     |     | 418  | 295  | 170  | 45   | Yes <sup>6,10</sup> |
| IPI00410800                                                       | 1E+08  | LOC100039128 | Yes | Yes | No  | 32  |     | 225  | 187  | 137  | 142  |     | 44  | 153  | 153  | 114  | 62   | Yes <sup>6,10</sup> |
| IPI00474558                                                       | 269966 | Nup98        | Yes | Yes | Yes |     |     | 148  | 208  |      |      |     |     | 187  | 266  | 170  | 80   | Yes <sup>6,10</sup> |
| IPI00880644                                                       | 108989 | Tpr          | Yes | Yes | Yes |     |     | 115  | 353  |      | 84   |     |     | 95   | 440  |      | 266  | Yes <sup>10</sup>   |
| IPI00221767                                                       | 103468 | Nup107       | Yes | Yes | No  |     |     | 94   | 63   |      |      |     |     | 304  | 201  | 100  | 149  | Yes <sup>6,10</sup> |
| IPI00116877                                                       | 212999 | Tnpo2        | Yes | Yes | No  | 30  | 37  |      |      |      | 44   |     | 30  | 153  | 110  |      | 193  | Yes <sup>10</sup>   |
| IPI00420243                                                       | 18141  | Nup50        | No  | Yes | No  |     |     |      |      |      |      |     |     | 84   | 87   | 123  | 93   | Yes <sup>6,10</sup> |
| GO annotated: Chromatin assembly or disassembly, chromosomal part |        |              |     |     |     |     |     |      |      |      |      |     |     |      |      |      |      |                     |
| IPI00320303                                                       | 234865 | Nup133       | Yes | No  | No  |     |     | 265  |      | 107  | 52   |     |     | 119  | 39   | 87   |      | Yes <sup>10</sup>   |
| IPI00395038                                                       | 103573 | Xpo1         | Yes | No  | No  |     | 70  | 171  | 269  | 80   | 325  | 179 |     | 168  | 73   | 141  |      | Yes <sup>10</sup>   |
| IPI00122594                                                       | 226747 | Ahctf1       | Yes | No  | Yes |     |     | 285  |      | 64   |      |     |     | 61   | 32   | 52   |      | No                  |
| IPI00896574                                                       | 21917  | LAP2α        | Yes | Yes | No  |     |     | 1090 | 1136 | 1223 | 1147 |     |     | 1449 | 1326 | 1266 | 1249 | Yes <sup>6,10</sup> |
| IPI00828976                                                       | 21917  | LAP2ε        | Yes | Yes | No  |     |     | 1626 | 1556 | 1686 | 1519 |     |     | 1501 | 1535 | 1505 | 1484 | Yes <sup>6,10</sup> |
| IPI00460291                                                       | 223697 | Unc84b/SUN2  | Yes | Yes | No  |     |     | 985  | 720  | 1566 | 1280 |     |     | 1318 | 1227 | 1449 | 1126 | Yes <sup>10</sup>   |
| IPI00129535                                                       | 59015  | Nup160       | Yes | Yes | No  |     |     | 499  |      | 134  | 134  |     |     | 90   | 61   | 266  |      | Yes <sup>6,10</sup> |
| IPI00649286                                                       | 12412  | Cbx1         | Yes | Yes | No  | 150 |     | 380  | 291  | 439  | 348  |     |     | 120  | 137  | 163  | 230  | Yes <sup>10</sup>   |
| IPI00919098                                                       | 77605  | H2afv        | Yes | Yes | No  |     |     | 160  | 162  | 155  | 217  |     | 108 | 170  | 157  | 163  |      | Yes <sup>10</sup>   |
| IPI00378480                                                       | 26914  | H2afy        | Yes | Yes | No  |     |     | 150  | 172  | 136  | 295  |     |     |      |      | 47   |      | Yes <sup>10</sup>   |
| IPI00221767                                                       | 103468 | Nup107       | Yes | Yes | No  |     |     | 94   | 63   |      |      |     |     | 304  | 201  | 100  | 149  | Yes <sup>6,10</sup> |
| IPI00331597                                                       | 14957  | Hist1h1d     | Yes | Yes | No  | 170 |     | 163  | 178  | 275  | 373  |     |     | 158  | 120  | 194  |      | No                  |
| IPI00850755                                                       | 18538  | Pcna         | Yes | Yes | Yes |     |     | 79   | 36   | 144  | 234  |     |     |      | 108  | 51   | 150  | No                  |
| IPI00225350                                                       | 12566  | Cdk2         | Yes | Yes | No  |     |     |      | 68   | 66   | 67   |     |     | 81   | 131  | 141  |      | No                  |
| IPI00331734                                                       | 666634 | H2AFZ        | No  | Yes | No  |     | 134 |      |      |      |      |     |     |      |      |      | 169  | Yes <sup>10</sup>   |
| IPI00459318                                                       | 319188 | Hist1h2bp    | No  | Yes | No  |     |     |      |      |      | 106  |     |     |      |      |      |      | Yes <sup>10</sup>   |
| IPI00111957                                                       | 319177 | Hist1h2ba    | No  | Yes | No  |     |     |      |      |      | 100  |     |     |      |      |      |      | Yes <sup>10</sup>   |
| IPI00123755                                                       | 12419  | Cbx5         | No  | Yes | No  | 113 | 32  | 146  | 212  | 526  | 115  | 65  | 121 | 153  | 135  | 172  | 350  | No                  |
| IPI00230133                                                       | 56702  | Hist1h1b     | No  | Yes | No  |     | 83  | 68   | 84   | 106  | 220  |     |     | 39   | 38   | 101  | 112  | No                  |
| IPI00223713                                                       | 50708  | Hist1h1c     | No  | Yes | No  |     | 158 |      |      |      |      |     |     |      |      |      | 203  | No                  |
| IPI00272033                                                       | 319176 | Hist2h2ac    | No  | Yes | No  |     |     |      |      | 185  |      |     |     |      |      |      |      | No                  |
| IPI00230264                                                       | 15270  | H2afx        | No  | Yes | No  |     |     |      |      |      | 171  |     |     |      |      |      |      | No                  |

|                                                                  |        |                   |     |     |     |     |     |      |      |      |      |     |     |      |      |      |      |                     |
|------------------------------------------------------------------|--------|-------------------|-----|-----|-----|-----|-----|------|------|------|------|-----|-----|------|------|------|------|---------------------|
| IPI00553538                                                      | 319152 | Hist1h3h          | No  | Yes | No  |     | 80  |      |      |      |      |     |     |      |      |      | 109  | No                  |
| <b>GO annotated: Cytoskeleton, actin cytoskeleton, sarcomere</b> |        |                   |     |     |     |     |     |      |      |      |      |     |     |      |      |      |      |                     |
| IPI00338039                                                      | 22151  | Tubb2a            | Yes | No  | No  |     |     | 936  | 1076 |      |      | 827 |     |      |      |      | 1041 | Yes <sup>10</sup>   |
| IPI00831369                                                      | 20742  | Spnb2             | Yes | No  | No  |     |     | 427  | 771  |      | 52   |     | 58  |      |      | 80   | 72   | Yes <sup>10</sup>   |
| IPI00753793                                                      | 20740  | Spna2             | Yes | No  | No  |     | 42  | 191  | 520  |      | 109  |     | 90  | 32   |      | 160  | 201  | Yes <sup>10</sup>   |
| IPI00229475                                                      | 16480  | Jup <sup>#</sup>  | Yes | No  | No  |     |     |      | 108  | 64   |      |     |     |      |      |      |      | Yes <sup>10</sup>   |
| IPI00321646                                                      | 230249 | Al314180          | Yes | No  | No  |     | 74  | 266  | 215  | 30   | 29   |     |     |      |      |      |      | No                  |
| IPI00458127                                                      | 13169  | Dbnl              | Yes | No  | No  | 35  | 84  | 166  | 221  | 76   | 84   | 59  | 161 |      |      | 96   | 114  | No                  |
| IPI00923036                                                      | 18571  | Pdcd6ip           | Yes | No  | No  |     |     | 158  | 250  | 45   | 153  | 65  | 50  | 63   | 37   | 66   | 63   | No                  |
| IPI00315504                                                      | 56327  | Arl2              | Yes | No  | No  |     | 47  |      | 152  | 106  | 59   | 51  |     | 64   |      | 31   | 70   | No                  |
| IPI00620256                                                      | 16905  | Lmna              | Yes | Yes | No  |     |     | 2825 | 2681 | 2654 | 2949 | 130 | 151 | 3970 | 3975 | 3365 | 3961 | Yes <sup>6,10</sup> |
| IPI00230394                                                      | 16906  | Lmnb1             | Yes | Yes | No  |     |     | 2339 | 2203 | 2328 | 2407 |     |     | 1999 | 1899 | 1668 | 1764 | Yes <sup>6,10</sup> |
| IPI00113886                                                      | 16907  | Lmnb2             | Yes | Yes | No  |     |     | 1765 | 1671 | 1652 | 1642 |     |     | 1263 | 1224 | 1152 | 1048 | Yes <sup>6,10</sup> |
| IPI00119876                                                      | 13424  | Dync1h1           | Yes | Yes | No  | 186 | 88  | 1365 | 383  | 483  | 1455 |     |     |      |      | 42   | 31   | Yes <sup>10</sup>   |
| IPI00114401                                                      | 13726  | Emd               | Yes | Yes | No  |     |     | 549  | 508  | 680  | 520  |     | 39  | 659  | 644  | 679  | 681  | Yes <sup>6,10</sup> |
| IPI00132475                                                      | 70361  | Lman1             | Yes | Yes | No  |     | 87  | 368  | 347  | 47   | 180  |     |     | 38   | 44   | 213  | 45   | Yes <sup>6</sup>    |
| IPI00776140                                                      | 12345  | Capzb             | Yes | Yes | No  | 180 | 221 | 296  | 338  | 341  | 335  | 38  | 31  | 62   | 153  | 281  | 163  | Yes <sup>10</sup>   |
| IPI00378480                                                      | 26914  | H2afy             | Yes | Yes | No  |     |     | 150  | 172  | 136  | 295  |     |     |      |      | 47   |      | Yes <sup>10</sup>   |
| IPI00276222                                                      | 218952 | Plekhc1           | Yes | Yes | No  |     |     | 114  |      |      | 168  | 48  |     |      |      | 43   |      | Yes <sup>10</sup>   |
| IPI00109061                                                      | 73710  | Tubb2b            | Yes | Yes | No  |     |     |      |      |      | 951  |     |     | 778  |      |      |      | Yes <sup>10</sup>   |
| IPI00133218                                                      | 67166  | Arl8b             | Yes | Yes | No  |     |     | 291  | 221  | 265  | 349  | 154 |     | 53   | 114  | 305  | 92   | No                  |
| IPI00406741                                                      | 17758  | Mtap4             | Yes | Yes | No  |     | 59  | 273  | 343  | 83   | 264  |     |     |      |      | 65   | 153  | No                  |
| IPI00467104                                                      | 1E+08  | FLI1              | Yes | Yes | No  |     |     | 125  |      | 160  | 200  |     |     |      |      | 43   |      | No                  |
| IPI00314844                                                      | 19230  | Twf1              | Yes | Yes | No  |     |     | 119  |      | 87   | 80   |     |     |      |      | 116  |      | No                  |
| IPI00116112                                                      | 69654  | Dctn2             | Yes | Yes | No  |     |     | 86   | 134  | 54   | 146  |     |     |      |      | 57   |      | No                  |
| IPI00653921                                                      | 19684  | Rdx               | Yes | Yes | No  |     |     |      | 362  |      | 584  |     | 185 | 72   |      |      |      | No                  |
| IPI00222228                                                      | 239673 | 4732456N10Rik     | Yes | Yes | No  |     |     |      |      | 146  |      |     |     |      | 211  |      |      | No                  |
| IPI00875117                                                      | 12933  | Crmp1             | Yes | Yes | No  |     |     |      | 140  |      |      |     |     |      | 91   | 105  | 104  | No                  |
| IPI00461532                                                      | 445007 | Nup85             | No  | Yes | No  |     |     | 77   | 42   |      |      |     |     | 87   |      | 109  |      | Yes <sup>6,10</sup> |
| IPI00117043                                                      | 11475  | Acta2             | No  | Yes | No  |     |     |      |      | 461  | 583  | 742 | 655 | 824  | 840  |      | 702  | No                  |
| IPI00874728                                                      | 22004  | Tpm2              | No  | Yes | Yes |     |     |      |      |      | 437  | 218 | 280 | 129  | 268  | 244  | 336  | No                  |
| IPI00475177                                                      | 20744  | Strbp             | No  | Yes | No  |     |     |      |      |      |      |     |     | 89   |      | 133  |      | No                  |
| IPI00624876                                                      | 22323  | Vasp              | No  | Yes | No  |     | 30  | 74   | 79   | 103  | 108  | 175 | 147 | 86   | 197  | 150  | 152  | No                  |
| IPI00124820                                                      | 23790  | Coro1c            | No  | Yes | No  |     |     |      |      |      | 103  | 88  |     | 69   | 92   | 70   | 97   | No                  |
| IPI00222509                                                      | 1E+08  | RCC2              | No  | Yes | No  | 34  |     | 66   |      | 106  | 104  |     |     | 36   | 46   | 41   |      | No                  |
| IPI00869430                                                      | 12331  | Cap1 <sup>#</sup> | No  | Yes | No  |     |     | 73   | 46   | 181  | 145  |     |     | 35   | 39   | 65   |      | No                  |

|                                                                                                                            |        |                    |     |     |     |     |     |     |     |     |     |     |    |     |     |     |     |                     |
|----------------------------------------------------------------------------------------------------------------------------|--------|--------------------|-----|-----|-----|-----|-----|-----|-----|-----|-----|-----|----|-----|-----|-----|-----|---------------------|
| IPI00330063                                                                                                                | 12340  | Capza1             | No  | Yes | No  |     | 165 | 143 | 71  | 176 | 271 |     | 34 |     | 97  | 123 | 124 | No                  |
| IPI00117896                                                                                                                | 667264 | BIM1p              | No  | Yes | No  |     |     | 50  | 122 | 112 | 122 |     | 45 |     | 80  | 108 | 77  | No                  |
| IPI00850054                                                                                                                | 18950  | Pnp                | No  | Yes | Yes | 36  |     | 40  |     | 142 | 194 |     |    |     | 113 |     | No  |                     |
| IPI00221613                                                                                                                | 545267 | ARF1               | No  | Yes | No  |     |     |     |     |     |     |     |    |     |     | 391 | No  |                     |
| IPI00111117                                                                                                                | 74192  | Arpc5l             | No  | Yes | No  |     |     |     |     |     | 109 |     |    |     |     | 91  | No  |                     |
| IPI00856759                                                                                                                | 17524  | Mpp1               | No  | Yes | Yes |     |     |     |     | 155 | 66  |     |    |     |     | 58  | No  |                     |
| <b>GO annotated: Endoplasmic reticulum (including GO subcategory 'Endoplasmic reticulum lumen', indicated by asterisk)</b> |        |                    |     |     |     |     |     |     |     |     |     |     |    |     |     |     |     |                     |
| IPI00109221                                                                                                                | 83493  | Sacm1l             | Yes | No  | No  |     |     | 581 |     | 38  | 96  |     |    |     |     |     |     | Yes <sup>6</sup>    |
| IPI00882182                                                                                                                | 76893  | Lass2              | Yes | No  | No  |     |     | 101 |     |     |     |     |    |     |     |     |     | Yes <sup>10</sup>   |
| IPI00468900                                                                                                                | 11938  | Atp2a2             | Yes | No  | No  | 231 |     | 822 |     | 104 | 274 |     |    |     | 34  |     |     | No                  |
| IPI00474904                                                                                                                | 65973  | Asph               | Yes | No  | No  |     | 125 | 506 | 463 | 203 | 243 |     |    |     |     |     | 33  | No                  |
| IPI00845575                                                                                                                | 109168 | 5730596K20Rik      | Yes | No  | Yes | 73  | 135 | 384 | 335 | 90  | 87  |     |    | 74  | 76  | 99  |     | No                  |
| IPI00222412                                                                                                                | 230709 | Zmpste24           | Yes | No  | No  |     |     | 270 |     |     | 69  |     |    |     |     |     |     | No                  |
| IPI00321646                                                                                                                | 230249 | Al314180           | Yes | No  | No  |     | 74  | 266 | 215 | 30  | 29  |     |    |     |     |     |     | No                  |
| IPI00754923                                                                                                                | 14950  | H13                | Yes | No  | No  |     |     | 181 |     | 28  | 85  |     |    |     |     |     |     | No                  |
| IPI00938457                                                                                                                | 69162  | Sec31a             | Yes | No  | No  |     |     | 167 | 125 |     | 87  | 90  |    |     |     | 56  |     | No                  |
| IPI00316469                                                                                                                | 68292  | Stt3b              | Yes | No  | No  |     |     | 167 |     | 29  |     |     |    |     |     |     |     | No                  |
| IPI00162949                                                                                                                | 52858  | Cdipt              | Yes | No  | No  |     |     | 157 |     |     | 79  |     |    |     |     |     |     | No                  |
| IPI00226882                                                                                                                | 53421  | Sec61a1            | Yes | No  | No  |     |     | 122 |     |     |     |     |    |     |     |     |     | No                  |
| IPI00115490                                                                                                                | 13026  | Pcyt1a             | Yes | Yes | No  |     |     | 435 | 455 | 475 | 285 |     |    |     |     |     |     | Yes <sup>10</sup>   |
| IPI00132475                                                                                                                | 70361  | Lman1              | Yes | Yes | No  |     | 87  | 368 | 347 | 47  | 180 |     |    | 38  | 44  | 213 | 45  | Yes <sup>6</sup>    |
| IPI00228236                                                                                                                | 66624  | Spcs2              | Yes | Yes | No  | 110 | 104 | 319 | 321 | 377 | 331 |     |    | 219 | 205 | 201 | 195 | Yes <sup>6,10</sup> |
| IPI00115668                                                                                                                | 13480  | Dpm1 <sup>#</sup>  | Yes | Yes | No  |     |     | 170 | 108 | 67  | 179 |     |    |     |     | 78  |     | Yes <sup>10</sup>   |
| IPI00831534                                                                                                                | 13849  | Ephx1              | Yes | Yes | No  |     |     | 76  | 139 | 192 | 323 | 56  | 34 | 62  | 145 | 151 | 60  | Yes <sup>6</sup>    |
| IPI00120083                                                                                                                | 74122  | Tmem43             | Yes | Yes | Yes |     |     | 53  |     | 165 | 197 |     |    | 201 | 128 | 175 | 169 | Yes <sup>6</sup>    |
| IPI00309035                                                                                                                | 103963 | Rpn1               | Yes | Yes | No  | 533 | 442 | 809 | 332 | 733 | 761 | 97  | 50 | 252 | 202 | 314 | 133 | No                  |
| IPI00880617                                                                                                                | 20333  | Sec22b             | Yes | Yes | No  | 71  |     | 454 | 398 | 489 | 338 | 100 | 93 | 351 | 346 | 502 | 386 | No                  |
| IPI00127406                                                                                                                | 26433  | Plod3              | Yes | Yes | No  |     |     | 347 | 378 | 101 | 161 |     |    |     |     | 94  |     | No                  |
| IPI00319973                                                                                                                | 53328  | Pgrmc1             | Yes | Yes | No  | 185 | 34  | 333 | 340 | 408 | 434 |     |    | 144 | 148 | 184 | 241 | No                  |
| IPI00132350                                                                                                                | 67006  | Cisd2              | Yes | Yes | No  |     |     | 164 | 62  | 232 | 142 |     |    |     |     | 34  | 59  | No                  |
| IPI00133249                                                                                                                | 20932  | Surf4              | Yes | Yes | No  |     |     | 147 |     | 106 | 151 |     |    | 69  |     | 57  |     | No                  |
| IPI00453798                                                                                                                | 67988  | Txndc10            | Yes | Yes | No  |     |     | 127 | 147 |     | 74  |     |    |     |     | 77  | 161 | No                  |
| IPI00377449                                                                                                                | 69922  | Vrk2               | Yes | Yes | No  |     |     | 112 | 188 | 469 | 115 |     |    | 377 | 121 | 148 | 122 | No                  |
| IPI00115644                                                                                                                | 20224  | Sar1a              | Yes | Yes | No  | 74  |     | 100 | 147 | 94  | 75  | 46  | 36 | 128 | 163 | 140 | 122 | No                  |
| IPI00132194                                                                                                                | 13722  | Scye1 <sup>#</sup> | Yes | Yes | Yes |     |     | 96  | 114 | 189 | 208 | 47  |    |     | 57  | 130 | 173 | No                  |
| IPI00137227                                                                                                                | 59021  | Rab2               | No  | Yes | No  | 261 | 118 | 582 | 275 | 674 | 603 | 233 | 52 | 284 | 399 | 456 | 170 | Yes <sup>10</sup>   |

|                                                 |        |                     |     |     |     |     |     |     |     |     |     |     |     |     |     |     |     |                   |
|-------------------------------------------------|--------|---------------------|-----|-----|-----|-----|-----|-----|-----|-----|-----|-----|-----|-----|-----|-----|-----|-------------------|
| IPI00118930                                     | 108124 | Napa                | No  | Yes | No  | 30  | 165 | 186 | 221 | 343 | 338 | 175 | 137 | 173 | 232 | 422 | 346 | Yes <sup>10</sup> |
| IPI00894977                                     | 56529  | Sec11a              | No  | Yes | No  | 265 | 133 | 208 | 249 | 290 | 180 |     |     | 109 | 73  | 209 | 84  | Yes <sup>10</sup> |
| IPI00410819                                     | 13200  | Ddost               | No  | Yes | No  | 171 | 196 | 251 | 232 | 320 | 331 | 58  | 29  | 103 | 100 | 214 | 79  | Yes <sup>6</sup>  |
| IPI00880783                                     | 18984  | Por                 | No  | Yes | No  | 51  | 107 | 45  | 58  |     | 208 |     |     |     | 31  | 186 |     | Yes <sup>6</sup>  |
| IPI00653744                                     | 98238  | Lrrc59              | No  | Yes | No  | 117 | 171 | 191 | 353 | 434 | 387 | 88  | 129 | 291 | 264 | 456 | 426 | No                |
| IPI00126042                                     | 68365  | Rab14               | No  | Yes | No  | 208 | 113 | 317 | 255 | 515 | 472 | 185 |     | 236 | 206 | 238 |     | No                |
| IPI00850678                                     | 671392 | set                 | No  | Yes | No  | 169 |     | 52  |     | 154 | 149 | 62  | 55  | 167 | 165 | 173 | 216 | No                |
| IPI00420727                                     | 76687  | Spcs3               | No  | Yes | No  | 87  |     | 147 | 142 | 159 | 150 |     |     |     | 63  | 103 |     | No                |
| IPI00121341                                     | 72736  | Txndc1              | No  | Yes | No  |     |     | 103 | 80  | 59  | 157 |     |     |     |     |     |     | No                |
| IPI00136098                                     | 17252  | Rdh11               | No  | Yes | No  |     |     | 80  | 103 | 178 | 153 |     |     |     |     |     |     | No                |
| IPI00312018                                     | 109154 | 2410014A08Rik       | No  | Yes | No  |     |     | 29  |     | 211 | 148 |     |     |     |     |     |     | No                |
| IPI00754386                                     | 50527  | Ero1l               | No  | Yes | No  |     |     |     |     |     | 152 |     |     |     |     |     |     | No                |
| IPI00881096                                     | 108123 | Napg                | No  | Yes | Yes |     |     |     | 30  | 161 | 128 |     |     |     |     | 46  |     | No                |
| IPI00762897                                     | 1E+08  | Uggt1*              | Yes | Yes | No  | 70  |     | 399 | 234 | 368 | 530 |     |     |     |     | 34  |     | Yes <sup>10</sup> |
| IPI00230108                                     | 14827  | Pdia3*              | No  | Yes | No  | 287 | 665 | 669 | 627 | 558 | 854 | 171 | 140 | 239 | 293 | 422 | 678 | No                |
| IPI00133522                                     | 18453  | P4hb*               | No  | Yes | No  | 381 | 717 | 358 | 646 | 585 | 694 | 65  |     | 97  | 74  | 132 | 376 | No                |
| <b>GO annotated: Proteasome complex</b>         |        |                     |     |     |     |     |     |     |     |     |     |     |     |     |     |     |     |                   |
| IPI00321646                                     | 230249 | Al314180            | Yes | No  | No  |     | 74  | 266 | 215 | 30  | 29  |     |     |     |     |     |     | No                |
| IPI00128945                                     | 26445  | Psmb2               | Yes | No  | No  | 107 |     | 55  | 48  | 173 | 118 |     |     |     | 112 | 80  |     | No                |
| IPI00675436                                     | 21762  | Psmd2               | Yes | Yes | No  | 35  | 49  | 440 | 632 | 203 | 442 |     |     |     |     | 73  |     | No                |
| IPI00652694                                     | 22123  | Psmd3               | Yes | Yes | No  | 77  | 46  | 243 |     | 190 | 267 | 43  |     |     |     |     |     | No                |
| IPI00457661                                     | 66998  | Psmd5               | No  | Yes | No  |     | 34  | 88  | 112 | 166 | 262 | 138 | 131 | 131 | 188 | 272 | 275 | No                |
| IPI00875197                                     | 19173  | Psmb5               | No  | Yes | No  | 177 | 77  | 401 | 207 | 400 | 455 | 77  |     |     |     | 135 |     | No                |
| IPI00114667                                     | 17463  | Psmd7               | No  | Yes | No  | 37  | 57  | 66  | 115 | 73  | 280 |     |     |     |     | 55  | 40  | No                |
| IPI00283862                                     | 26440  | Psma1               | No  | Yes | No  |     |     | 39  |     |     | 192 |     |     |     |     |     |     | No                |
| IPI00856490                                     | 57296  | Psmd8               | No  | Yes | No  |     |     |     |     |     | 108 |     |     |     |     |     |     | No                |
| IPI00124223                                     | 665766 | PSME1               | No  | Yes | Yes |     |     |     |     | 49  | 196 |     | 40  |     |     | 71  | 113 | No                |
| <b>Other GO categories, or not GO annotated</b> |        |                     |     |     |     |     |     |     |     |     |     |     |     |     |     |     |     |                   |
| IPI00762905                                     | 1E+08  | gcn1l               | Yes | No  | No  | 57  | 54  | 239 | 177 | 35  | 113 | 94  | 88  | 69  | 54  | 203 | 40  | Yes <sup>10</sup> |
| IPI00310131                                     | 11772  | Ap2a2               | Yes | No  | No  |     | 43  | 183 | 123 | 61  | 160 |     |     |     |     |     |     | Yes <sup>10</sup> |
| IPI00396739                                     | 93762  | Smarca5             | Yes | No  | No  |     |     | 180 | 68  | 71  |     |     |     |     |     |     |     | Yes <sup>10</sup> |
| IPI00622911                                     | 11771  | Ap2a1               | Yes | No  | No  |     |     | 177 | 96  |     |     |     |     |     |     |     |     | Yes <sup>10</sup> |
| IPI00222188                                     | 12843  | Col1a2 <sup>#</sup> | Yes | No  | No  | 49  |     | 157 | 289 | 32  | 61  |     |     |     |     |     |     | Yes <sup>10</sup> |
| IPI00623191                                     | 12842  | Col1a1 <sup>#</sup> | Yes | No  | No  | 36  | 71  | 156 | 213 | 73  | 130 |     | 114 |     | 198 |     | 157 | Yes <sup>10</sup> |
| IPI00876119                                     | 20652  | Soat1               | Yes | No  | No  |     |     | 106 |     | 60  | 94  |     |     | 52  | 61  | 110 | 62  | Yes <sup>10</sup> |
| IPI00776338                                     | 212073 | 4831426I19Rik       | Yes | No  | No  |     |     | 105 | 310 |     |     |     |     |     |     |     | 99  | Yes <sup>10</sup> |



|             |        |                     |     |    |     |     |     |     |     |     |     |     |    |     |     |     |     |    |
|-------------|--------|---------------------|-----|----|-----|-----|-----|-----|-----|-----|-----|-----|----|-----|-----|-----|-----|----|
| IPI00230440 | 269378 | Ahcy                | Yes | No | No  |     | 71  | 468 | 425 | 231 | 194 | 60  |    | 82  | 147 | 243 | 58  | No |
| IPI00120503 | 70349  | Copb1               | Yes | No | No  | 86  | 97  | 441 | 258 | 208 | 326 | 114 | 90 | 38  |     | 116 | 43  | No |
| IPI00310091 | 51792  | Ppp2r1a             | Yes | No | No  |     | 66  | 292 | 164 | 48  | 132 |     | 34 | 74  | 56  | 32  | 166 | No |
| IPI00761611 | 672511 | Rnf213              | Yes | No | No  |     |     | 242 |     |     |     | 84  |    |     |     | 213 |     | No |
| IPI00129571 | 12825  | Col3a1 <sup>#</sup> | Yes | No | No  |     |     | 237 | 425 |     |     |     |    |     |     |     |     | No |
| IPI00876212 | 1E+08  | LOC100042058        | Yes | No | No  | 309 |     | 230 | 181 | 197 | 255 |     |    |     | 115 |     |     | No |
| IPI00118827 | 103266 | AI597468            | Yes | No | No  |     |     | 226 | 161 |     |     |     |    |     |     |     |     | No |
| IPI00761666 | 320528 | Vps13c              | Yes | No | No  |     |     | 196 |     |     |     |     |    | 54  |     |     |     | No |
| IPI00230192 | 14681  | Gnao1               | Yes | No | Yes |     |     | 182 | 202 |     |     |     |    | 86  |     |     |     | No |
| IPI00322145 | 57874  | Ptplad1             | Yes | No | No  | 56  |     | 176 |     | 143 | 155 |     |    | 43  |     | 47  |     | No |
| IPI00128376 | 105387 | Akr1c14             | Yes | No | No  |     | 33  | 164 | 84  |     |     |     |    |     |     |     |     | No |
| IPI00131606 | 21982  | Tmem165             | Yes | No | No  |     |     | 155 |     |     |     |     |    |     |     |     |     | No |
| IPI00119113 | 11966  | Atp6v1b2            | Yes | No | No  |     | 46  | 155 | 182 | 103 | 86  |     |    |     |     |     |     | No |
| IPI00885380 | 18542  | Pcolce <sup>#</sup> | Yes | No | No  |     |     | 149 | 75  |     |     |     |    |     |     | 52  |     | No |
| IPI00222429 | 211548 | Nomo1               | Yes | No | No  |     |     | 141 |     | 51  | 97  |     |    |     |     |     |     | No |
| IPI00136012 | 56316  | Ggcx                | Yes | No | No  |     |     | 136 |     | 40  | 49  | 33  |    |     |     |     |     | No |
| IPI00416751 | 63959  | Slc29a1             | Yes | No | No  |     |     | 127 |     |     |     |     |    |     |     |     |     | No |
| IPI00918505 | 20848  | Stat3               | Yes | No | No  |     |     | 127 |     |     |     | 83  |    |     | 90  | 150 |     | No |
| IPI00890921 | 26885  | Casp8ap2            | Yes | No | No  |     |     | 121 |     |     |     |     | 48 |     |     |     |     | No |
| IPI00623214 | 56305  | Pitpnb              | Yes | No | No  |     |     | 120 | 153 | 96  | 70  |     |    |     |     | 88  | 41  | No |
| IPI00624746 | 1E+08  | impD                | Yes | No | No  |     |     | 119 |     | 98  |     |     |    |     |     |     |     | No |
| IPI00132057 | 433204 | LOC433204           | Yes | No | No  |     |     | 118 |     |     |     |     |    |     |     |     |     | No |
| IPI00226260 | 107358 | Tm9sf3              | Yes | No | No  |     |     | 112 |     |     |     |     |    |     |     |     |     | No |
| IPI00885610 | 24045  | Scamp3              | Yes | No | No  |     |     | 111 |     |     |     |     |    |     |     |     |     | No |
| IPI00877337 | 216820 | Dhrs7b              | Yes | No | No  |     |     | 110 |     |     |     |     |    |     |     |     |     | No |
| IPI00890284 | 19338  | Rab33b              | Yes | No | No  |     |     | 110 | 100 |     |     |     |    |     |     |     |     | No |
| IPI00831544 | 20430  | Cyfp1               | Yes | No | No  |     |     | 107 |     | 47  | 67  |     |    |     |     |     |     | No |
| IPI00114948 | 80876  | Ifitm2              | Yes | No | No  |     |     | 106 |     |     |     |     |    |     |     |     |     | No |
| IPI00331577 | 1E+08  | SLC7A5              | Yes | No | No  |     |     | 106 |     |     | 61  |     |    |     |     |     |     | No |
| IPI00128760 | 664953 | Ubce7               | Yes | No | No  |     |     | 105 | 117 |     | 93  |     |    | 127 |     | 44  | 75  | No |
| IPI00896668 | 53881  | Slc5a3              | Yes | No | No  |     |     | 103 |     |     |     |     |    |     |     |     |     | No |
| IPI00467004 | 20846  | Stat1               | Yes | No | No  |     |     | 89  | 125 |     |     |     |    |     |     | 119 | 74  | No |
| IPI00930846 | 21399  | Tcea1               | Yes | No | No  | 194 | 103 | 88  | 143 | 68  | 197 |     | 33 | 83  | 171 | 97  | 72  | No |
| IPI00876197 | 56758  | Mbnl1               | Yes | No | Yes |     |     | 75  |     | 33  |     |     |    | 67  | 140 |     |     | No |
| IPI00649871 | 230073 | Ddx58               | Yes | No | No  |     |     | 53  | 149 |     |     | 59  |    |     | 48  | 90  |     | No |
| IPI00378145 | 270192 | Rab6b               | Yes | No | Yes |     |     |     | 202 |     |     |     |    | 205 | 154 |     |     | No |

|             |        |                      |     |     |     |     |     |     |     |     |     |     |     |     |     |     |     |                     |
|-------------|--------|----------------------|-----|-----|-----|-----|-----|-----|-----|-----|-----|-----|-----|-----|-----|-----|-----|---------------------|
| IPI00752798 | 668668 | EG668668             | Yes | No  | No  | 286 |     |     |     |     | 349 |     |     | 122 | 162 |     |     | No                  |
| IPI00742438 | 18749  | Prkacb               | Yes | No  | No  |     |     |     | 139 |     |     |     |     |     |     |     |     | No                  |
| IPI00876048 | 17931  | Ppp1r12a             | Yes | No  | No  |     |     |     | 129 |     |     |     |     |     |     |     |     | No                  |
| IPI00849985 | 1E+08  | Ube-2                | Yes | No  | No  |     |     |     | 126 |     |     |     |     |     |     |     |     | No                  |
| IPI00135969 | 11566  | Adss                 | Yes | No  | No  |     |     |     | 127 | 38  | 91  |     | 45  |     | 184 | 225 |     | No                  |
| IPI00331152 | 12988  | Csk                  | Yes | No  | No  |     |     |     | 122 |     |     |     | 58  |     |     |     |     | No                  |
| IPI00663582 | 545121 | Gm5805               | Yes | No  | No  |     |     |     |     |     |     |     |     |     | 115 |     |     | No                  |
| IPI00454037 | 67023  | Use1                 | Yes | No  | No  |     |     |     |     |     |     |     |     |     | 135 |     | 46  | No                  |
| IPI00132397 | 66397  | Sar1b                | Yes | No  | No  | 52  |     |     |     | 66  | 74  |     | 33  | 103 |     |     | 92  | No                  |
| IPI00230003 | 18738  | Pitpna               | Yes | No  | No  |     |     |     | 110 | 41  |     |     |     |     |     | 33  |     | No                  |
| IPI00330624 | 21820  | Nup153               | Yes | Yes | Yes |     |     | 448 | 155 | 59  | 142 |     |     | 247 | 189 | 282 |     | Yes <sup>6,10</sup> |
| IPI00351206 | 70804  | Pgrmc2               | Yes | Yes | Yes |     |     | 402 | 237 | 630 | 576 |     |     |     |     | 99  | 150 | Yes <sup>6</sup>    |
| IPI00221616 | 11845  | Arf6                 | Yes | Yes | No  | 64  | 60  | 363 | 217 | 354 | 284 | 51  | 56  | 81  | 41  | 117 | 104 | Yes <sup>10</sup>   |
| IPI00929832 | 70699  | Nup205               | Yes | Yes | No  |     |     | 317 | 289 | 262 | 52  |     |     | 364 | 477 | 297 | 59  | Yes <sup>6,10</sup> |
| IPI00849548 | 19344  | Rab5b                | Yes | Yes | Yes |     |     | 276 | 302 | 351 | 349 |     |     |     |     | 266 |     | Yes <sup>10</sup>   |
| IPI00135443 | 21974  | Top2b                | Yes | Yes | No  | 197 | 47  | 271 | 58  | 172 | 302 | 36  |     | 85  | 138 | 169 | 48  | Yes <sup>10</sup>   |
| IPI00128450 | 23943  | Mbc2                 | Yes | Yes | No  |     | 30  | 265 | 127 | 125 | 137 |     |     |     |     |     |     | Yes <sup>6</sup>    |
| IPI00759945 | 11545  | Parp1                | Yes | Yes | No  |     |     | 228 | 162 | 180 | 77  |     |     | 91  | 198 | 142 | 52  | Yes <sup>10</sup>   |
| IPI00679159 | 668144 | EG668144             | Yes | Yes | No  |     |     | 156 | 83  | 239 | 244 |     | 31  |     | 37  |     |     | Yes <sup>10</sup>   |
| IPI00119063 | 16971  | Lrp1                 | Yes | Yes | No  | 119 | 227 | 617 | 433 | 229 | 582 |     | 40  | 89  | 98  | 168 | 127 | No                  |
| IPI00817018 | 252870 | Usp7                 | Yes | Yes | No  | 52  |     | 433 | 114 | 256 | 436 |     |     | 42  |     | 44  | 81  | No                  |
| IPI00116283 | 12462  | Cct3                 | Yes | Yes | No  | 254 | 387 | 407 | 352 | 357 | 461 | 42  | 49  | 173 |     | 272 | 57  | No                  |
| IPI00116770 | 19330  | Rab18                | Yes | Yes | No  | 192 | 298 | 396 | 467 | 606 | 577 | 74  | 130 | 359 | 335 | 389 | 286 | No                  |
| IPI00130118 | 19325  | Rab10                | Yes | Yes | No  |     |     | 352 |     | 385 | 378 |     |     |     |     |     |     | No                  |
| IPI00128692 | 18194  | Nsdhl                | Yes | Yes | No  |     |     | 210 | 125 | 119 | 121 |     |     |     |     | 65  | 73  | No                  |
| IPI00649022 | 14387  | Gaa                  | Yes | Yes | No  | 30  |     | 168 | 114 | 147 | 75  |     |     |     |     |     |     | No                  |
| IPI00468209 | 69834  | Rab43                | Yes | Yes | No  |     |     | 124 |     | 177 | 147 |     |     |     |     |     |     | No                  |
| IPI00404970 | 667205 | Cdc42GAP             | Yes | Yes | No  |     |     | 84  | 174 |     | 119 | 39  |     |     |     |     |     | No                  |
| IPI00353563 | 14086  | Fscn1                | Yes | Yes | No  | 44  | 52  | 67  |     | 266 | 211 |     |     | 70  | 185 | 191 |     | No                  |
| IPI00311873 | 19046  | Ppp1cb               | Yes | Yes | No  |     | 249 |     |     |     | 502 |     |     |     | 175 | 402 |     | No                  |
| IPI00338854 | 14679  | Gnai3                | Yes | Yes | No  |     |     |     | 170 |     | 249 |     |     |     |     |     |     | No                  |
| IPI00648683 | 11764  | Ap1b1                | Yes | Yes | No  |     |     |     | 142 |     |     |     |     | 68  | 79  | 138 | 98  | No                  |
| IPI00116031 | 433739 | RBM10                | No  | Yes | No  |     | 117 |     |     | 121 |     | 143 | 51  | 149 | 156 | 354 | 278 | Yes <sup>10</sup>   |
| IPI00225201 | 105148 | lars                 | No  | Yes | No  | 232 | 443 | 409 | 160 | 478 | 628 | 75  | 58  | 91  | 75  | 241 |     | Yes <sup>10</sup>   |
| IPI00132966 | 433862 | Cyp-40               | No  | Yes | Yes |     | 121 |     | 52  | 199 | 179 |     |     | 82  | 110 | 107 | 199 | Yes <sup>10</sup>   |
| IPI00881909 | 12816  | Col12a1 <sup>#</sup> | No  | Yes | No  | 38  |     |     |     |     | 166 |     |     | 78  |     | 44  |     | Yes <sup>10</sup>   |

|             |        |                       |    |     |     |     |     |     |     |     |     |     |     |     |     |     |     |                   |
|-------------|--------|-----------------------|----|-----|-----|-----|-----|-----|-----|-----|-----|-----|-----|-----|-----|-----|-----|-------------------|
| IPI00850734 | 15502  | Dnaja1                | No | Yes | No  | 123 | 33  | 121 | 132 | 161 | 218 |     |     | 66  | 129 | 187 | 110 | Yes <sup>10</sup> |
| IPI00857796 | 21841  | Tia1                  | No | Yes | No  |     |     |     |     | 104 |     | 174 | 110 | 50  | 179 | 268 | 257 | Yes <sup>10</sup> |
| IPI00828216 | 245688 | Rbbp7                 | No | Yes | No  |     |     | 71  | 124 |     | 131 |     | 39  | 30  | 62  | 38  |     | Yes <sup>10</sup> |
| IPI00223437 | 54161  | Copg                  | No | Yes | No  |     | 171 | 335 | 299 | 71  | 174 |     |     |     |     | 127 |     | Yes <sup>10</sup> |
| IPI00828225 | 27061  | Bcap31                | No | Yes | No  |     |     | 138 | 56  | 122 | 96  |     |     |     |     | 35  | 30  | Yes <sup>6</sup>  |
| IPI00785470 | 56348  | Hsd17b12 <sup>#</sup> | No | Yes | No  |     |     | 57  | 127 | 108 | 133 |     |     |     | 52  | 72  | 55  | Yes <sup>6</sup>  |
| IPI00133708 | 110957 | D1Pas1                | No | Yes | No  |     |     |     |     |     |     |     |     |     |     | 780 |     | Yes <sup>10</sup> |
| IPI00323674 | 20227  | Sart1                 | No | Yes | No  | 744 |     |     |     |     |     |     |     |     | 38  | 79  | 221 | Yes <sup>10</sup> |
| IPI00785231 | 18949  | Pnn                   | No | Yes | Yes | 597 |     |     |     | 98  |     |     |     |     |     | 67  | 143 | Yes <sup>10</sup> |
| IPI00626402 | 100088 | Rcc1                  | No | Yes | No  |     |     |     |     | 85  | 153 |     |     |     | 37  |     |     | Yes <sup>10</sup> |
| IPI00121434 | 71973  | Rbpms2                | No | Yes | No  |     |     |     |     | 106 |     | 47  |     |     |     | 88  | 70  | Yes <sup>10</sup> |
| IPI00226515 | 21345  | Tagln                 | No | Yes | No  |     |     |     |     |     | 122 | 519 | 571 | 610 | 694 | 620 | 564 | No                |
| IPI00877291 | 11746  | Anxa4                 | No | Yes | No  | 475 | 473 | 812 | 750 | 469 | 433 | 126 | 63  | 199 | 236 | 315 | 282 | No                |
| IPI00671512 | 675985 | Gm16406               | No | Yes | No  |     |     |     |     |     | 247 |     |     | 109 | 89  | 196 |     | No                |
| IPI00857053 | 17220  | Mcm7                  | No | Yes | No  | 75  | 58  | 80  | 162 | 197 | 218 | 45  | 41  | 107 | 82  | 190 | 142 | No                |
| IPI00111181 | 65114  | Vps35                 | No | Yes | Yes | 162 | 316 | 317 | 546 | 325 | 589 | 66  | 218 | 91  | 171 | 376 | 517 | No                |
| IPI00116281 | 12466  | Cct6a                 | No | Yes | No  | 135 | 232 | 268 | 341 | 222 | 269 |     | 32  | 86  | 71  | 121 | 82  | No                |
| IPI00410836 | 14156  | Fen1                  | No | Yes | Yes |     |     |     |     | 172 | 139 | 46  | 67  | 83  | 152 | 180 | 163 | No                |
| IPI00311968 | 14300  | Frg1                  | No | Yes | Yes | 91  |     |     | 81  | 226 | 50  |     |     | 78  | 45  | 128 |     | No                |
| IPI00309195 | 19653  | Rbm4                  | No | Yes | No  |     |     |     |     | 121 |     | 109 | 135 | 74  |     |     | 48  | No                |
| IPI00659447 | 380928 | Lmo7                  | No | Yes | No  |     |     |     |     |     |     | 64  | 86  | 69  |     | 392 | 207 | No                |
| IPI00132089 | 19072  | Prep                  | No | Yes | Yes | 64  |     |     |     |     | 260 | 129 | 69  | 64  | 51  | 279 |     | No                |
| IPI00351266 | 72162  | Dhx36                 | No | Yes | No  | 31  |     | 57  |     | 39  |     | 29  |     | 58  | 52  | 135 | 68  | No                |
| IPI00123881 | 17219  | Mcm6                  | No | Yes | No  |     |     | 49  | 82  | 82  | 179 |     |     | 57  |     | 60  | 74  | No                |
| IPI00331556 | 15525  | Hspa4                 | No | Yes | Yes | 54  | 145 | 140 | 44  | 282 | 386 | 32  |     | 55  | 42  | 72  | 47  | No                |
| IPI00848364 | 1E+08  | Gm3940                | No | Yes | No  |     |     |     |     |     |     |     | 45  | 51  |     | 169 |     | No                |
| IPI00461281 | 52653  | Nudcd2                | No | Yes | No  | 39  | 39  |     | 41  | 120 |     | 69  | 44  | 46  | 42  | 64  | 65  | No                |
| IPI00222515 | 69077  | Psmd11                | No | Yes | No  |     |     | 40  | 36  | 86  | 164 | 34  | 47  | 45  | 64  | 52  | 36  | No                |
| IPI00757459 | 12388  | Ctnnd1                | No | Yes | No  |     |     |     | 66  |     |     | 59  | 45  | 39  | 55  | 186 | 314 | No                |
| IPI00114285 | 14873  | Gsto1                 | No | Yes | No  | 36  | 41  | 118 | 98  | 159 | 240 | 121 | 36  | 38  | 51  | 194 | 126 | No                |
| IPI00918305 | 1E+08  | AHNAK2                | No | Yes | No  |     |     |     | 64  |     | 112 | 74  | 61  | 38  | 52  | 63  | 76  | No                |
| IPI00894870 | 28114  | Nsun2                 | No | Yes | Yes | 46  | 65  | 41  | 72  | 142 | 221 | 107 | 91  | 37  | 116 | 183 | 164 | No                |
| IPI00881557 | 22235  | Ugdh                  | No | Yes | No  | 80  |     | 50  | 136 | 234 | 333 | 33  |     | 34  |     |     |     | No                |
| IPI00339428 | 67299  | Dock7                 | No | Yes | No  |     |     |     |     |     | 112 |     |     | 33  |     |     | 31  | No                |
| IPI00652902 | 14678  | Gnai2                 | No | Yes | No  | 235 | 279 | 298 | 305 | 370 | 437 |     |     |     | 85  | 198 |     | No                |
| IPI00776216 | 30930  | Vps26a                | No | Yes | No  | 150 | 34  | 284 | 215 | 269 | 315 | 31  |     |     |     | 133 | 34  | No                |

|             |        |                    |    |     |     |     |     |     |     |     |     |    |    |  |    |     |     |    |
|-------------|--------|--------------------|----|-----|-----|-----|-----|-----|-----|-----|-----|----|----|--|----|-----|-----|----|
| IPI00930882 | 17254  | Slc3a2             | No | Yes | No  | 71  | 55  | 231 | 125 | 256 | 307 |    |    |  |    |     |     | No |
| IPI00230721 | 12903  | Crabp1             | No | Yes | Yes | 255 |     | 201 | 195 | 411 | 311 | 36 | 99 |  | 69 | 319 | 238 | No |
| IPI00123278 | 69051  | Pycr2              | No | Yes | No  | 126 | 83  | 167 | 158 | 216 | 258 | 33 |    |  |    | 102 |     | No |
| IPI00133931 | 66120  | Fkbp11             | No | Yes | No  |     | 42  | 99  | 85  | 136 | 150 |    |    |  | 86 | 98  | 61  | No |
| IPI00119853 | 14683  | Gnas               | No | Yes | Yes |     | 38  | 96  | 116 | 116 | 247 |    |    |  |    | 104 | 96  | No |
| IPI00468688 | 110960 | Tars               | No | Yes | Yes | 35  |     | 82  | 40  | 219 | 370 |    | 32 |  |    | 164 | 34  | No |
| IPI00915484 | 20204  | Prrx2              | No | Yes | No  |     |     | 76  | 85  | 61  |     |    |    |  | 42 |     | 130 | No |
| IPI00284806 | 15452  | Hprt1              | No | Yes | No  | 39  |     | 69  | 69  | 124 | 115 |    |    |  |    | 70  | 58  | No |
| IPI00875405 | 70247  | Psmc1              | No | Yes | No  |     |     | 65  | 37  | 44  | 164 |    |    |  |    |     |     | No |
| IPI00313841 | 11972  | Atp6v0d1           | No | Yes | No  |     | 32  | 54  |     |     | 169 |    |    |  |    | 34  |     | No |
| IPI00111981 | 67059  | Ola1               | No | Yes | No  |     |     | 43  | 38  | 115 |     |    |    |  | 49 | 35  | 123 | No |
| IPI00315550 | 620016 | LOC620016          | No | Yes | YEs |     | 37  | 37  | 44  | 42  | 45  |    | 38 |  | 55 | 127 | 133 | No |
| IPI00624501 | 56495  | Asna1              | No | Yes | No  |     |     | 32  | 49  | 135 | 159 |    |    |  |    |     |     | No |
| IPI00555002 | 76108  | Rap2a              | No | Yes | No  |     |     | 30  |     |     | 106 |    | 38 |  |    | 44  |     | No |
| IPI00669935 | 21825  | Thbs1 <sup>#</sup> | No | Yes | Yes | 144 | 122 |     |     | 447 | 807 |    |    |  |    | 41  |     | No |
| IPI00123176 | 622339 | EG622339           | No | Yes | No  |     |     |     |     |     |     |    |    |  |    | 395 |     | No |
| IPI00137145 | 67543  | Pabpc3             | No | Yes | Yes |     |     |     |     |     | 102 |    |    |  |    | 551 |     | No |
| IPI00311569 | 227620 | Uap1l1             | No | Yes | No  |     | 102 |     |     |     |     | 31 |    |  |    | 194 | 197 | No |
| IPI00116734 | 19335  | Rab23              | No | Yes | No  |     |     |     |     |     | 167 |    |    |  |    |     |     | No |
| IPI00108844 | 17113  | M6pr               | No | Yes | No  |     |     |     |     |     | 138 |    |    |  |    |     |     | No |
| IPI00411102 | 110639 | Prps2              | No | Yes | No  |     |     |     |     |     | 132 |    |    |  |    |     |     | No |
| IPI00318564 | 68991  | Ssu72              | No | Yes | No  |     |     |     |     |     |     |    |    |  | 59 | 170 | 166 | No |
| IPI00762203 | 634386 | FTL2 <sup>#</sup>  | No | Yes | Yes |     |     |     |     | 36  | 280 |    |    |  |    |     | 70  | No |
| IPI00918973 | 20901  | Strap              | No | Yes | No  |     |     |     |     | 60  | 191 |    |    |  |    |     |     | No |
| IPI00111959 | 51797  | Ctps               | No | Yes | No  |     |     |     |     |     | 122 |    |    |  |    |     |     | No |
| IPI00113127 | 19341  | Rab4a              | No | Yes | No  |     |     |     |     |     |     |    |    |  |    |     | 122 | No |
| IPI00134206 | 67622  | Mxra7              | No | Yes | No  |     |     |     |     |     | 109 |    |    |  |    |     |     | No |
| IPI00118248 | 18933  | Prx1               | No | Yes | Yes |     |     |     |     | 56  |     |    |    |  |    | 107 | 163 | No |
| IPI00318204 | 75456  | Prps1l1            | No | Yes | No  |     |     |     |     |     | 108 |    |    |  |    |     |     | No |
| IPI00123465 | 26894  | Cops7a             | No | Yes | No  |     | 39  |     | 64  |     | 147 |    |    |  |    |     |     | No |
| IPI00221908 | 241490 | Rbm45              | No | Yes | Yes | 63  | 46  |     |     | 123 |     |    |    |  |    | 125 | 118 | No |
| IPI00229703 | 22318  | Vamp2              | No | Yes | No  |     |     |     |     |     | 100 |    |    |  |    |     |     | No |
| IPI00875087 | 665834 | Gm7813             | No | Yes | No  |     |     |     |     |     |     |    |    |  | 90 | 108 |     | No |
